# Supplementary material
Source: publisher figshare collection journal article supplement (https://gsajournals.figshare.com/ndownloader/files/22364190)

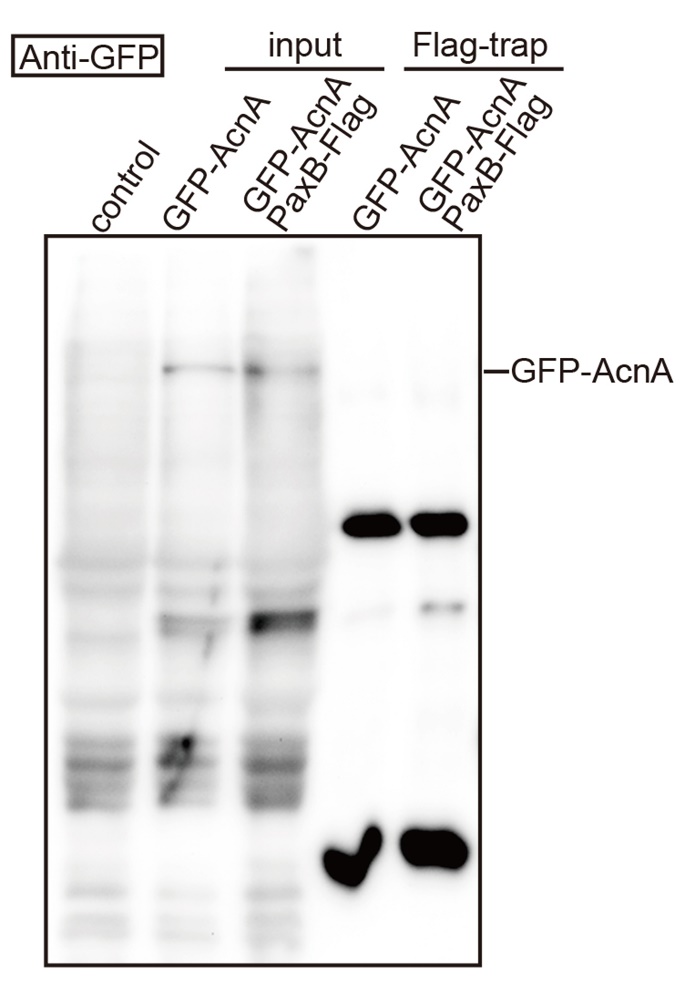


**Figure S6. Co-IP assay for α-actinin and PaxB.**

Supplement: Supplementary file 1 [file 22364190]
